# Supplementary material for: Idiopathic Premature Ventricular Contractions Catheter Ablation, Sedentary Population vs Athlete’s Populations: Outcomes and Resumption of Sports Activity
Source: Preprints.org preprint supplement (doi:10.20944/preprints202401.1029.v1), 2024-01-14
Supplement: Supplementary file 1 [file supplementary]

**Supplementary Materials**

Definition:

- Sedentary patient: a patient who does not engage in regular and habitual physical activity

- Athletes patient: a patient who engage in regular and habitual physical activity

- Agonist athletes patient: patients who engage in sports physical activity not recreationally but at high intensity level aimed at competition.

RVOT, LVOT and fascicular origin from 12-lead-ECG was established in relation to the criteria proposed by the these articles: 27,28,29.
